# Supplementary material for: Water isotopic characterisation of the cloud-circulation coupling in the North Atlantic trades. Part 1: A process-oriented evaluation of COSMO iso simulations with EUREC 4 A observations
Source: Copernicus journal article supplement (doi:10.5194/egusphere-2023-449), 2023-03-28
Supplement: Supplementary file 2 [file egusphere-2023-449-supplement.zip]

Archive with 4 entries (4 files):
- acp_paper_supplement1.pdf
- acp_paper_supplement2.pdf
- acp_paper_supplement3.pdf
- acp_paper_supplement4.pdf
