# Supplementary material for: Water isotopic characterisation of the cloud-circulation coupling in the North Atlantic trades. Part 1: A process-oriented evaluation of COSMO iso simulations with EUREC 4 A observations
Source: Copernicus journal article supplement (doi:10.5194/egusphere-2023-449), 2023-03-28
Supplement: Supplementary file 2 [file egusphere-2023-449-supplement.zip › acp_paper_supplement3.pdf]

### Further characterisation of cloud base features

In this supplement, the number of cloud base grid points identified as *dry-warm* (see text in the paper for the definition) in the domain  $54.5\text{--}61^\circ\text{ W}$ ,  $11\text{--}16^\circ\text{ N}$  from the  $\text{COSMO}_{\text{iso},1\text{km}}$  data is provided (Fig. S3.1). Furthermore, the distribution of the anomalies (as shown in the paper, but here including minimum and maximum values; Fig. S3.2) and absolute values (Fig. S3.3) of specific humidity and isotope parameters of the different cloud base features *dry-warm*, *clear*, *cloud*, and *cloud-rain* (see text in the paper for the definition) are shown.

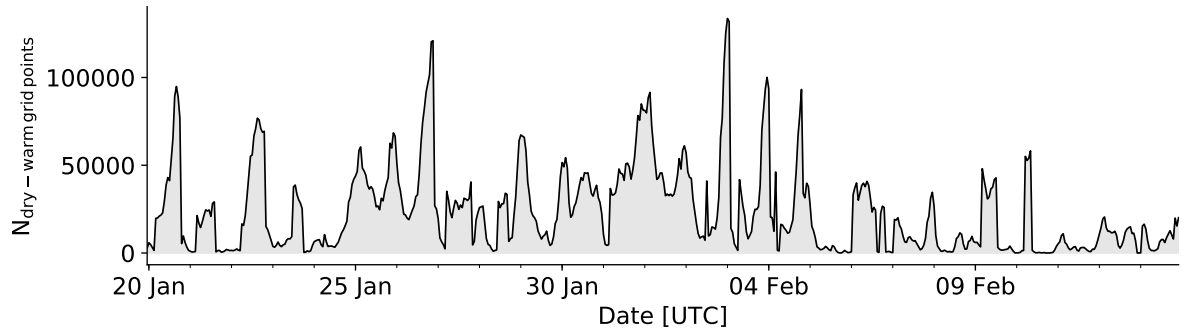

**Figure S3.1:** Time series of the number of cloud base grid points identified as dry-warm in the domain  $54.5\text{--}61^\circ\text{ W}$ ,  $11\text{--}16^\circ\text{ N}$  (316028 grid points available) from the  $\text{COSMO}_{\text{iso},1\text{km}}$  data.

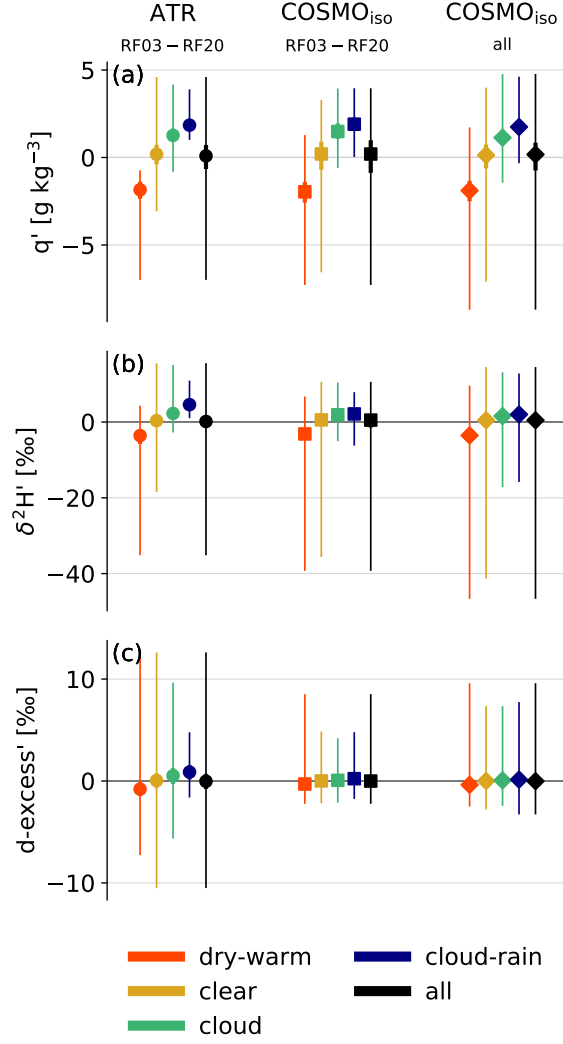

**Figure S3.2:** Distributions of the cloud base anomalies in (a) specific humidity, (b)  $\delta^2H$  in vapour, and (c) d-excess in vapour for the data points identified as *dry-warm*, *clear*, *cloud*, *cloud-rain* (see paper for the definition) and all of them together (black) from the ATR and COSMO<sub>iso,1km</sub>. For the ATR data, anomalies are defined relative to each flight's mean cloud base conditions. For COSMO<sub>iso,1km</sub>, anomalies are defined relative to each time steps mean cloud base conditions in the domain 54.5-61° W, 11-16° N. Shown are median (markers) and the minimum-maximum range (lines) of the cloud base data points collected by the ATR (RF03-RF20), the COSMO<sub>iso,1km</sub> cloud base grid points at the hourly time steps that are closest to the ATR flights (COSMO<sub>iso,RF03-RF20</sub>), and over the whole simulated period (20 January to 13 February 2020; COSMO<sub>iso,all</sub>).

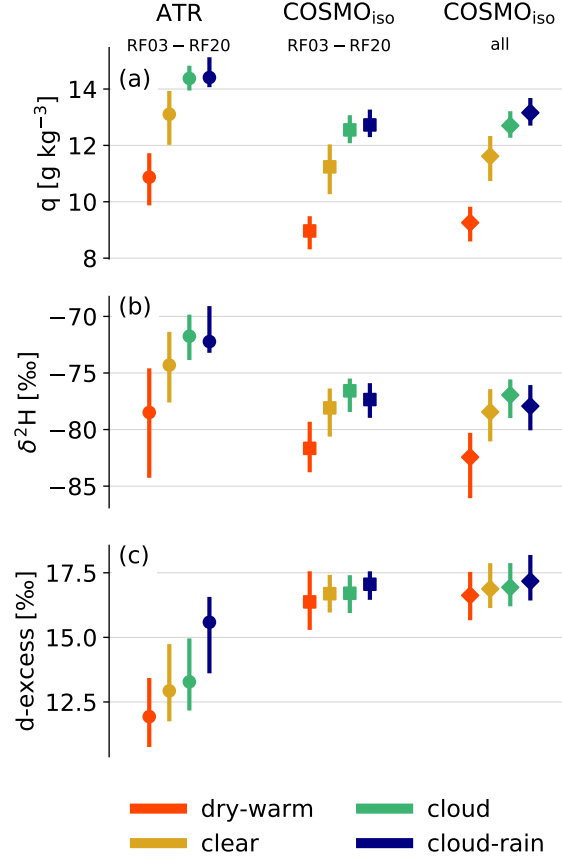

**Figure S3.3:** Distributions of the cloud base values of (a) specific humidity, (b)  $\delta^2\text{H}$  in vapour, and (c) d-excess in vapour for the data points identified as *dry-warm*, *clear*, *cloud*, and *cloud-rain* (see text in the paper for the definition) from the ATR and COSMO<sub>iso,1km</sub>. Shown are the median (markers) and the 25-75-percentile range (lines) over the cloud base time steps of the ATR (RF03-RF20), the COSMO<sub>iso,1km</sub> cloud base grid points at the hourly time steps that are closest to the ATR flights (COSMO<sub>iso,RF03-RF20</sub>), and over the whole simulated period (20 January to 13 February 2020; COSMO<sub>iso,all</sub>). For the COSMO<sub>iso,1km</sub> simulation, only the data in the domain 54.5-61° W, 11-16° N are taken into account.
